# Supplementary material
Source: PubMed Central journal article supplement (PMC4208972)
Supplement: NIHMS627631-supplement-Supplementary_Table_1.pdf [file NIHMS627631-supplement-Supplementary_Table_1.pdf]

## ANALYTICAL AND BIOANALYTICAL CHEMISTRY

## Electronic Supplementary Material

## Microscale depletion of high abundance proteins in human biofluids using IgY14 immunoaffinity resin: analysis of human plasma and cerebrospinal fluid

Seok-Won Hyung, Paul D. Piehowski, Ronald J. Moore, Daniel J. Orton, Athena A. Schepmoes, Therese R. Clauss, Rosalie K. Chu, Thomas L. Fillmore, Heather Brewer, Tao Liu, Rui Zhao, and Richard D. Smith

**Table S1.** A summary table of literature results for recent CSF studies

| # Proteins  | Method                                                                                                                                                                  | Reference                                                     | Affiliation                                                                  |
|-------------|-------------------------------------------------------------------------------------------------------------------------------------------------------------------------|---------------------------------------------------------------|------------------------------------------------------------------------------|
| 798         | 2.5 ml pooled CSF, 2 ml of individual CSF, 10 kDa cutoff filtration (high and low molecular weight ranges)                                                              | <b>Journal of Proteome Research</b> 2008, 7, 386–399          | Max-Planck-Institute for Biochemistry                                        |
| 1,212       | ProteoMiner, 1,290 ml pooled CSF → SDS-PAGE using 150 µg of FF or nontreated of CSF → cut 20 lanes → digestion → LC-MS/MS (Orbitrap)                                    | <b>Molecular &amp; Cellular Proteomics</b> 9:1006–1021, 2010. | Institut de Pharmacologie et de Biologie Structurale                         |
| 2,594       | CSF proteome characterization in three groups based on the proteomic platforms.                                                                                         | <b>Proteomics</b> 2007, 7, 469–473                            | Department of Pathology, University of Washington                            |
|             | 1 <sup>st</sup> group: 1. SDS-PAGE → CSF digest → SCX-RPLC online or offline (each 100 µg) → LTQ-FT, LCQ. 2. Pooled CSF → ICAT labeling → LC-MS/MS → 1,474 protein IDs. |                                                               |                                                                              |
|             | 2 <sup>nd</sup> group: 400 µg of CSF tryptic digest → ACN fractionation → RP-LC, MALDI TOF/TOF → 1,583 protein IDs with single peptides                                 |                                                               |                                                                              |
|             | 3 <sup>rd</sup> group: Glycoprotein analysis → 2 ml of pooled CSF → MudPIT, LCQ → 359 protein IDs                                                                       |                                                               |                                                                              |
| 156 and 535 | 750 µg of CSF → IgY14 → FF (3 replicates) → LTQ-FT → 156 unique protein IDs                                                                                             | <b>Clinical Proteomics</b> 2011, 8:6                          | Laboratoire de Neurobiochimie, Université Jean Monnet, Saint Etienne, France |
|             | 750 µg of CSF → IgYHSA RP30 → FF (3 replicates) → LTQ-FT → 535 unique protein IDs                                                                                       |                                                               |                                                                              |

|       |                                                                                                                                  |                                                  |                                                                                                                  |
|-------|----------------------------------------------------------------------------------------------------------------------------------|--------------------------------------------------|------------------------------------------------------------------------------------------------------------------|
| 1,506 | 18 ml of CSF → IgY14 LC10 → 30 fractions of SCX with 300 µg of FF and BF → RPLC LTQ and LTQ-Orbitrap                             | <i>PLoS ONE</i> 2010;5:e 10980                   | University of Medicine and Dentistry of New Jersey-New Jersey Medical School and Pacific Northwest National Lab. |
| 219   | 4 ml of pooled CSF → MARS (for 6 abundant proteins) column → iTRAQ with digests → SCX → LC-MS/MS (QSTAR Pulsar i quadrupole-TOF) | <i>Proteomics</i> 2007, 7, 3726                  | Department of Chemistry, North Carolina State University                                                         |
| 289   | 100 µL of pooled CSF (3 control and 3 transgenic) → IgY14 depletion → 90 min RPLC → amaZon ETD ion trap                          | Journal of Proteome Research 2013,12, 719-728    | Department of Chemistry & School of Pharmacy, University of Wisconsin-Madison                                    |
| 242   | 10 µL of CSF (41 animals) → 180 min RPLC → LTQ Orbitrap XL                                                                       | Journal of Proteome Research 2012, 11, 4315-4325 | Department of Analytical Biochemistry, Centre for Pharmacy, University of Groningen                              |
| 368   | 1 mL CSF → Gelfree 8100 (12 fractions) → 70 min RPLC → LTQ Orbitrap                                                              | Journal of Proteome Research 2012, 11, 3143-3149 | Department of Pharmacology and Molecular Sciences, Johns Hopkins School of Medicine                              |

**Table S2.** All identified proteins obtained from human plasma and CSF in this study are including protein identifications consisting of ≥1 unique peptide - 216\_2014\_8058\_MOESM2\_ESM.xlsx
